# Supplementary material
Source: PubMed Central journal article supplement (PMC2040393)

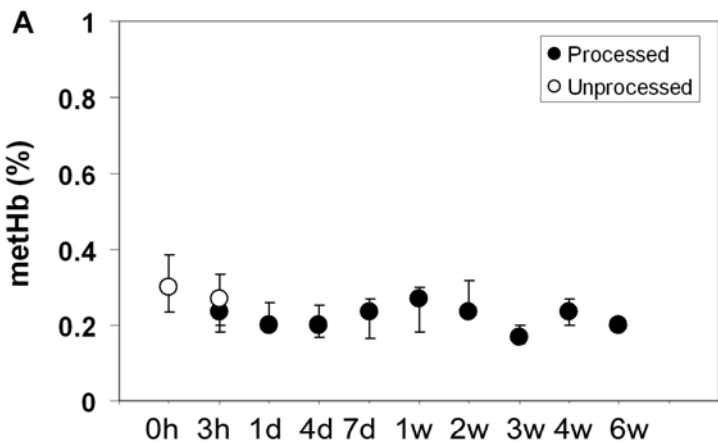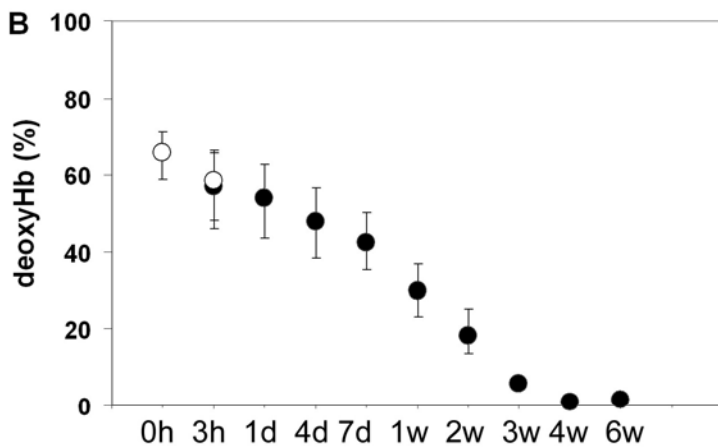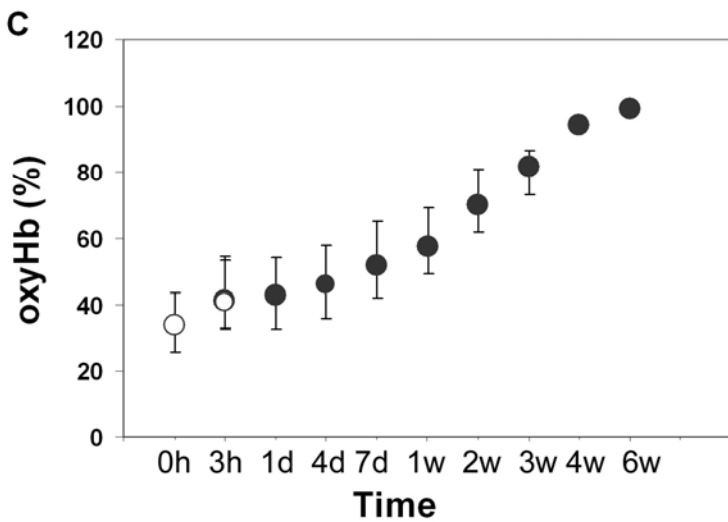

Supplement: pnas_0708160104_1.pdf [file pnas_0708160104_1.pdf]

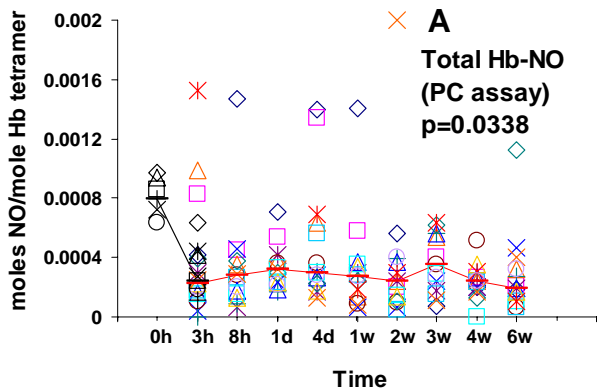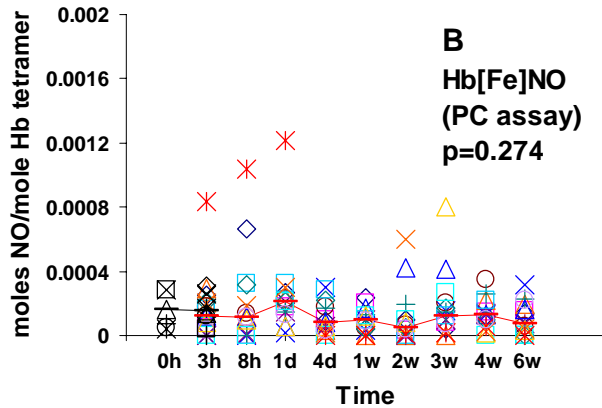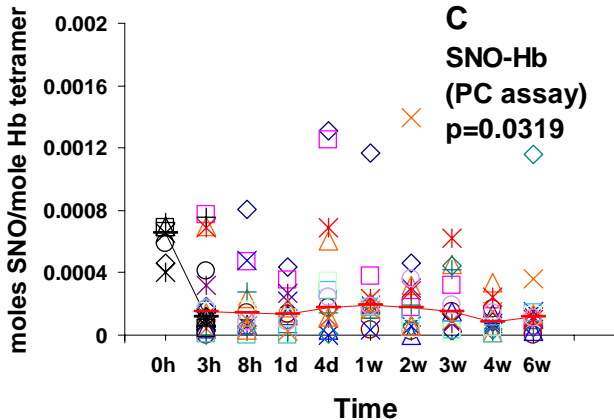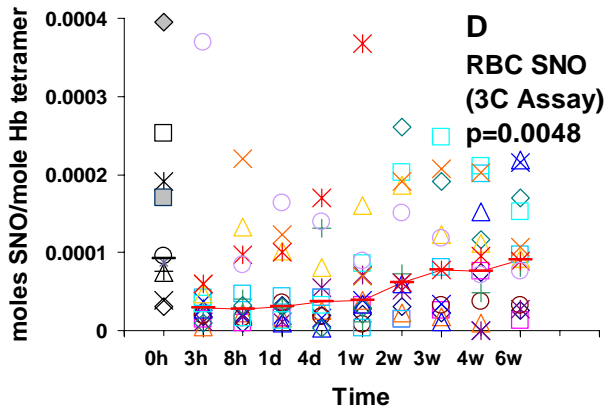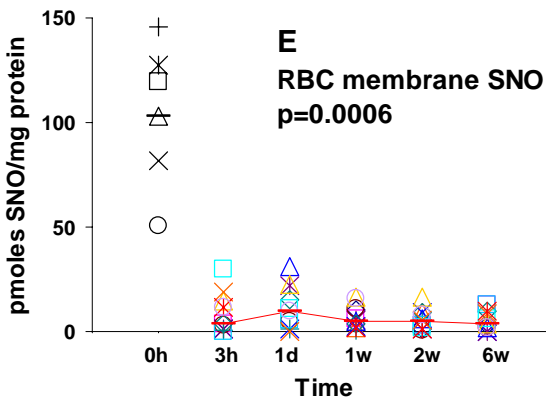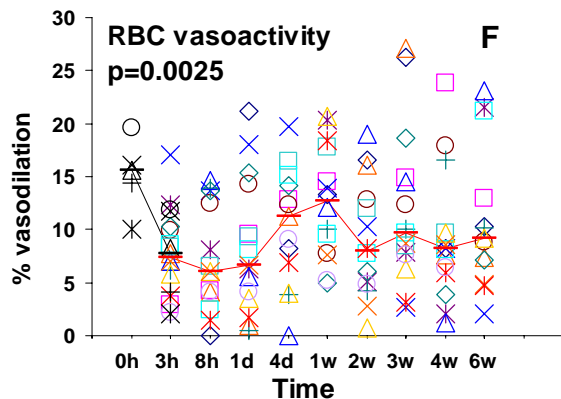

Supplement: pnas_0708160104_2.pdf [file pnas_0708160104_2.pdf]

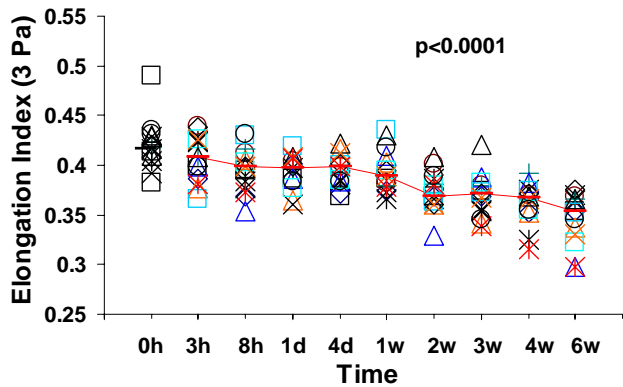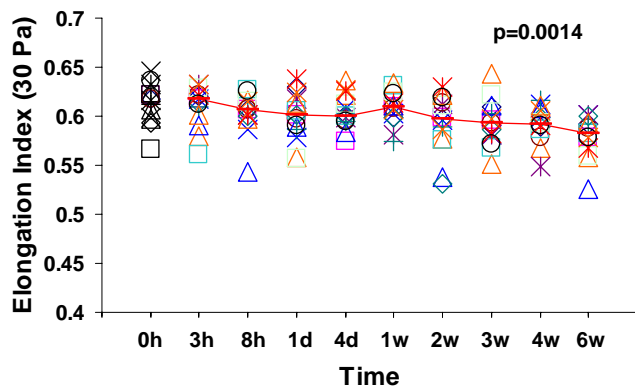

Supplement: pnas_0708160104_3.pdf [file pnas_0708160104_3.pdf]

Interleukin 6

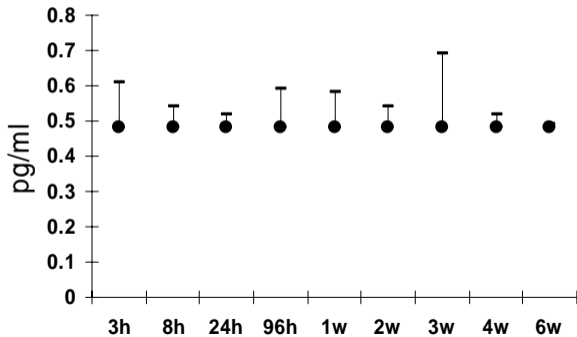

Interleukin 8

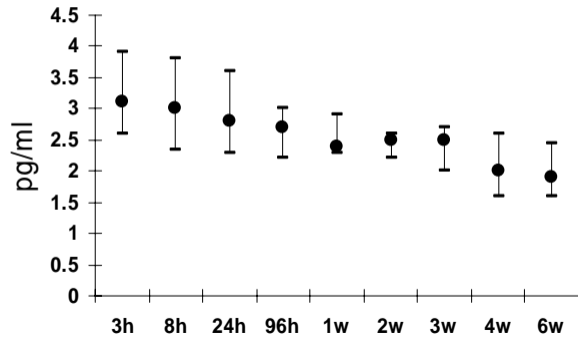

Supplement: pnas_0708160104_4.pdf [file pnas_0708160104_4.pdf]
